# Supplementary material for: Identification of Lipid Markers of Plasmopara viticola Infection in Grapevine Using a Non-targeted Metabolomic Approach
Source: PubMed Central journal article supplement (PMC5871909; doi:10.3389/fpls.2018.00360), 2018-03-21

*Supplementary Material*

**Identification of lipid markers of *Plasmopara viticola* infection in grapevine using a non-targeted metabolomic approach**

**Lise Negrel, David Halter, Sabine Wiedemann-Merdinoglu, Camille Rustenholz, Didier Merdinoglu, Philippe Hugueney, Raymonde Baltenweck\***

**\*Correspondence:**

Raymonde Baltenweck

raymonde.baltenweck@inra.fr

**Supplementary Table S1:** Characteristics of the 123 major ions (peak area > 10<sup>6</sup>), which are at least 15 times more abundant in sporangia extracts than leaf extracts, based on XCMS automated integration. Analyses were performed on one experiment including three biological replicates of extracts of *P. viticola* sporangia and of mock-inoculated leaves (Healthy\_leaves). Ions are numbered according to their retention time. For all ions, the identifier, the fold change between sporangia and leaf extracts, the *m/z* and retention time (RT) are indicated. For p-value calculation, background intensity level was set to 10000 and subtracted to every integrated value. Integrated values under the background intensity were set at 1. These corrected integrated values were log<sub>10</sub>-transformed before performing Welch's two-sample *t*-tests. TPI = Time Post-Inoculation. NA refers to inapplicable statistical tests, for which the compounds could not be detected above the background level. NS = Not significant = p-value > 0.05 ; \* = 0.01 < p-value ≤ 0.05 ; \*\* = 0.001 < p-value ≤ 0.01 ; \*\*\* = 0.001 ≤ p-value. Differential ions with p-value ≤ 0.05 were considered for further characterization.

| Ion n° | identifier | fold | m/z      | RT     | Healthy_leaves1 | Healthy_leaves2 | Healthy_leaves3 | Sporangia1 | Sporangia2 | Sporangia3 | p-value  | signi. |
|--------|------------|------|----------|--------|-----------------|-----------------|-----------------|------------|------------|------------|----------|--------|
| 1      | M337T33    | Inf  | 337.1213 | 33.17  | 0.00E+00        | 0.00E+00        | 0.00E+00        | 6.85E+06   | 1.86E+07   | 1.53E+07   | 3.50E-04 | ***    |
| 2      | M338T33    | Inf  | 338.1246 | 33.17  | 0.00E+00        | 0.00E+00        | 0.00E+00        | 1.37E+06   | 3.76E+06   | 3.10E+06   | 4.45E-04 | ***    |
| 3      | M339T33    | 1527 | 339.1184 | 33.17  | 2.30E+03        | 2.47E+03        | 3.79E+03        | 2.20E+06   | 6.03E+06   | 4.82E+06   | 4.07E-04 | ***    |
| 4      | M359T39    | 53   | 359.2577 | 38.81  | 5.11E+04        | 6.47E+04        | 9.75E+04        | 2.24E+06   | 5.00E+06   | 4.01E+06   | 2.38E-04 | ***    |
| 5      | M377T39    | 220  | 377.2683 | 38.81  | 6.48E+04        | 7.96E+04        | 1.11E+05        | 1.02E+07   | 2.64E+07   | 1.95E+07   | 2.38E-04 | ***    |
| 6      | M378T39    | 86   | 378.2717 | 38.81  | 5.96E+04        | 4.28E+04        | 5.67E+04        | 2.49E+06   | 6.41E+06   | 4.76E+06   | 9.17E-04 | ***    |
| 7      | M380T41    | 29   | 380.2873 | 41.13  | 8.26E+04        | 5.52E+04        | 7.52E+04        | 1.04E+06   | 2.88E+06   | 2.20E+06   | 2.58E-03 | **     |
| 8      | M379T42    | 29   | 379.2839 | 41.59  | 3.36E+05        | 2.45E+05        | 3.06E+05        | 4.62E+06   | 1.19E+07   | 8.97E+06   | 3.52E-03 | **     |
| 9      | M356T43    | 35   | 356.2873 | 42.51  | 4.71E+04        | 5.54E+04        | 8.44E+04        | 1.19E+06   | 3.03E+06   | 2.29E+06   | 6.66E-04 | ***    |
| 10     | M303T44    | 347  | 303.2316 | 43.87  | 1.35E+05        | 1.55E+05        | 1.80E+05        | 2.81E+07   | 7.46E+07   | 6.04E+07   | 1.26E-03 | **     |
| 11     | M304T44    | 436  | 304.2350 | 43.87  | 2.50E+04        | 1.97E+04        | 3.46E+04        | 5.93E+06   | 1.58E+07   | 1.28E+07   | 8.92E-05 | ***    |
| 12     | M305T48    | 68   | 305.2474 | 47.97  | 1.95E+05        | 1.59E+05        | 2.37E+05        | 7.02E+06   | 1.83E+07   | 1.48E+07   | 1.59E-03 | **     |
| 13     | M281T50    | 16   | 281.2473 | 50.26  | 3.30E+05        | 3.09E+05        | 4.05E+05        | 2.91E+06   | 7.60E+06   | 6.07E+06   | 7.34E-03 | **     |
| 14     | M307T53    | 25   | 307.2629 | 52.64  | 1.06E+05        | 9.28E+04        | 1.06E+05        | 1.35E+06   | 3.46E+06   | 2.88E+06   | 6.57E-03 | **     |
| 15     | M806T79    | 403  | 806.4726 | 79.16  | 5.90E+03        | 0.00E+00        | 1.29E+04        | 1.21E+06   | 3.29E+06   | 3.10E+06   | 4.39E-02 | *      |
| 16     | M661T85    | 38   | 661.4825 | 84.66  | 2.32E+05        | 2.99E+05        | 9.52E+05        | 9.83E+06   | 2.35E+07   | 2.24E+07   | 3.64E-03 | **     |
| 17     | M482T90    | 256  | 482.2666 | 90.11  | 9.53E+03        | 9.27E+03        | 2.65E+04        | 2.41E+06   | 2.36E+06   | 6.83E+06   | 6.61E-02 | .      |
| 18     | M662T92    | 42   | 662.4856 | 91.67  | 8.81E+04        | 1.29E+05        | 3.97E+05        | 4.56E+06   | 1.09E+07   | 1.04E+07   | 4.38E-03 | **     |
| 19     | M492T96    | Inf  | 492.4773 | 96.14  | 0.00E+00        | 0.00E+00        | 0.00E+00        | 4.63E+06   | 1.08E+07   | 9.30E+06   | 2.71E-04 | ***    |
| 20     | M493T96    | 380  | 493.4807 | 96.14  | 9.68E+03        | 6.47E+03        | 6.18E+03        | 1.56E+06   | 3.71E+06   | 3.20E+06   | 3.30E-04 | ***    |
| 21     | M617T103   | Inf  | 616.5662 | 103.49 | 0.00E+00        | 0.00E+00        | 0.00E+00        | 1.10E+06   | 2.92E+06   | 2.44E+06   | 4.33E-04 | ***    |
| 22     | M587T108   | 16   | 587.4670 | 107.85 | 7.93E+04        | 6.94E+04        | 7.95E+05        | 2.90E+06   | 6.29E+06   | 6.22E+06   | 4.30E-02 | *      |
| 23     | M588T108   | 17   | 588.4705 | 107.85 | 3.00E+04        | 1.54E+04        | 3.09E+05        | 1.15E+06   | 2.54E+06   | 2.47E+06   | 6.78E-02 | .      |
| 24     | M621T115   | 110  | 621.4876 | 115.10 | 2.17E+04        | 2.73E+04        | 4.92E+04        | 2.30E+06   | 4.14E+06   | 4.37E+06   | 7.88E-04 | ***    |
| 25     | M622T115   | 587  | 622.4909 | 115.17 | 9.50E+02        | 2.91E+03        | 4.26E+03        | 1.02E+06   | 1.80E+06   | 1.94E+06   | 2.06E-04 | ***    |

|    |          |        |          |        |          |          |          |          |          |          |          |     |
|----|----------|--------|----------|--------|----------|----------|----------|----------|----------|----------|----------|-----|
| 26 | M639T115 | 1519   | 639.4981 | 115.17 | 1.25E+04 | 1.08E+04 | 1.95E+04 | 1.18E+07 | 2.72E+07 | 2.58E+07 | 2.74E-03 | **  |
| 27 | M642T115 | 17     | 641.5042 | 115.48 | 1.15E+05 | 9.56E+04 | 1.17E+05 | 1.06E+06 | 2.53E+06 | 2.14E+06 | 5.68E-03 | **  |
| 28 | M641T116 | 3900   | 640.5015 | 115.66 | 2.67E+03 | 1.05E+03 | 3.71E+03 | 5.27E+06 | 1.22E+07 | 1.15E+07 | 2.86E-04 | *** |
| 29 | M363T123 | 20     | 363.2890 | 122.92 | 1.01E+05 | 8.92E+04 | 9.82E+04 | 1.02E+06 | 2.39E+06 | 2.36E+06 | 7.60E-03 | **  |
| 30 | M666T124 | 48     | 665.5134 | 123.80 | 1.41E+05 | 1.31E+05 | 1.47E+05 | 3.48E+06 | 8.49E+06 | 8.10E+06 | 5.03E-03 | **  |
| 31 | M667T124 | 245    | 666.5168 | 123.80 | 1.06E+04 | 1.92E+04 | 8.34E+03 | 1.61E+06 | 3.96E+06 | 3.76E+06 | 6.81E-02 | .   |
| 32 | M565T125 | 23     | 564.5150 | 125.15 | 6.85E+04 | 5.63E+04 | 7.77E+05 | 5.02E+06 | 7.89E+06 | 7.44E+06 | 4.50E-02 | *   |
| 33 | M236T125 | 173    | 236.2371 | 125.15 | 4.41E+04 | 4.94E+04 | 4.06E+04 | 4.25E+06 | 1.01E+07 | 8.93E+06 | 1.42E-03 | **  |
| 34 | M254T125 | 29     | 254.2477 | 125.15 | 6.91E+04 | 6.66E+04 | 5.81E+04 | 1.02E+06 | 2.41E+06 | 2.15E+06 | 4.33E-03 | **  |
| 35 | M502T125 | Inf    | 502.4980 | 125.15 | 0.00E+00 | 0.00E+00 | 0.00E+00 | 3.56E+06 | 8.12E+06 | 7.40E+06 | 2.80E-04 | *** |
| 36 | M504T125 | 141    | 503.5013 | 125.15 | 1.14E+04 | 1.19E+04 | 2.53E+04 | 1.24E+06 | 2.95E+06 | 2.66E+06 | 7.33E-03 | **  |
| 37 | M521T125 | 14665  | 520.5084 | 125.15 | 6.60E+03 | 7.29E+03 | 1.38E+04 | 7.51E+07 | 1.74E+08 | 1.57E+08 | 2.76E-02 | *   |
| 38 | M522T125 | 200    | 521.5117 | 125.15 | 2.99E+05 | 2.09E+05 | 2.47E+05 | 2.80E+07 | 6.47E+07 | 5.85E+07 | 7.05E-04 | *** |
| 39 | M523T125 | 109    | 522.5150 | 125.15 | 1.01E+05 | 7.25E+04 | 8.24E+04 | 5.05E+06 | 1.20E+07 | 1.08E+07 | 1.06E-03 | **  |
| 40 | M539T125 | 16     | 538.5189 | 125.15 | 9.86E+04 | 9.00E+04 | 7.88E+05 | 2.85E+06 | 6.68E+06 | 5.97E+06 | 3.47E-02 | *   |
| 41 | M540T125 | 35     | 539.5223 | 125.15 | 1.39E+04 | 1.04E+04 | 1.37E+05 | 1.00E+06 | 2.44E+06 | 2.22E+06 | 7.26E-02 | .   |
| 42 | M356T126 | 128    | 356.3156 | 125.61 | 2.02E+04 | 2.36E+04 | 2.10E+04 | 1.64E+06 | 3.53E+06 | 3.12E+06 | 6.59E-04 | *** |
| 43 | M284T126 | 22     | 284.2945 | 126.06 | 9.81E+04 | 1.08E+05 | 9.02E+04 | 1.35E+06 | 2.69E+06 | 2.36E+06 | 2.74E-03 | **  |
| 44 | M541T140 | 714    | 540.5348 | 140.45 | 5.86E+03 | 1.70E+03 | 1.69E+04 | 3.23E+06 | 7.29E+06 | 6.92E+06 | 4.98E-02 | *   |
| 45 | M542T140 | 2354   | 541.5381 | 140.45 | 5.68E+02 | 2.15E+03 | 0.00E+00 | 1.15E+06 | 2.69E+06 | 2.57E+06 | 3.66E-04 | *** |
| 46 | M642T142 | 144    | 641.5134 | 141.81 | 9.67E+04 | 8.82E+04 | 9.69E+04 | 7.67E+06 | 1.65E+07 | 1.63E+07 | 2.17E-03 | **  |
| 47 | M643T142 | 153    | 642.5168 | 141.81 | 4.19E+04 | 3.70E+04 | 3.92E+04 | 3.48E+06 | 7.36E+06 | 7.22E+06 | 1.59E-03 | **  |
| 48 | M359T142 | 91     | 359.2577 | 142.26 | 3.63E+04 | 4.55E+04 | 5.05E+04 | 2.56E+06 | 4.63E+06 | 4.79E+06 | 1.38E-04 | *** |
| 49 | M624T146 | 97     | 623.5586 | 145.89 | 3.59E+04 | 1.74E+04 | 5.00E+04 | 2.05E+06 | 4.21E+06 | 3.81E+06 | 3.75E-03 | **  |
| 50 | M623T146 | 49     | 622.5551 | 146.34 | 1.85E+05 | 1.05E+05 | 1.62E+05 | 4.59E+06 | 9.02E+06 | 8.44E+06 | 1.79E-04 | *** |
| 51 | M668T147 | 8522   | 667.5290 | 147.24 | 0.00E+00 | 6.42E+02 | 0.00E+00 | 1.04E+06 | 2.18E+06 | 2.25E+06 | 3.13E-04 | *** |
| 52 | M547T150 | 123    | 547.4718 | 149.51 | 7.17E+05 | 5.14E+05 | 4.78E+05 | 1.57E+08 | 1.35E+07 | 4.01E+07 | 2.24E-02 | *   |
| 53 | M548T150 | 122    | 548.4753 | 149.51 | 2.73E+05 | 1.99E+05 | 1.80E+05 | 5.92E+07 | 5.19E+06 | 1.48E+07 | 2.17E-02 | *   |
| 54 | M527T153 | 2379   | 526.5192 | 152.67 | 0.00E+00 | 7.29E+02 | 3.74E+03 | 2.36E+06 | 4.71E+06 | 3.56E+06 | 1.79E-04 | *** |
| 55 | M644T160 | 66     | 643.5292 | 159.58 | 4.10E+04 | 3.85E+04 | 5.39E+04 | 1.55E+06 | 3.68E+06 | 3.59E+06 | 1.09E-03 | **  |
| 56 | M619T164 | 216    | 618.5617 | 163.55 | 9.69E+03 | 1.93E+04 | 7.23E+04 | 5.38E+06 | 8.99E+06 | 7.50E+06 | 1.17E-01 | NS  |
| 57 | M618T164 | 26     | 617.5659 | 163.97 | 1.11E+04 | 5.78E+03 | 2.01E+05 | 1.44E+06 | 2.39E+06 | 1.89E+06 | 1.50E-01 | NS  |
| 58 | M557T164 | Inf    | 556.5449 | 164.41 | 0.00E+00 | 0.00E+00 | 0.00E+00 | 3.80E+06 | 8.46E+06 | 6.91E+06 | 2.38E-04 | *** |
| 59 | M576T164 | Inf    | 575.5585 | 164.41 | 0.00E+00 | 0.00E+00 | 0.00E+00 | 3.81E+07 | 8.45E+07 | 6.99E+07 | 1.80E-04 | *** |
| 60 | M577T164 | 12373  | 576.5620 | 164.41 | 0.00E+00 | 3.22E+03 | 0.00E+00 | 7.86E+06 | 1.75E+07 | 1.44E+07 | 2.18E-04 | *** |
| 61 | M558T164 | 2909   | 557.5483 | 164.46 | 0.00E+00 | 1.96E+03 | 6.98E+02 | 1.52E+06 | 3.38E+06 | 2.84E+06 | 2.75E-04 | *** |
| 62 | M575T164 | 277242 | 574.5553 | 164.46 | 0.00E+00 | 1.66E+03 | 0.00E+00 | 9.28E+07 | 2.02E+08 | 1.67E+08 | 1.55E-04 | *** |
| 63 | M578T164 | 108    | 577.5652 | 164.46 | 2.19E+04 | 9.66E+03 | 1.80E+04 | 1.04E+06 | 2.36E+06 | 1.98E+06 | 1.15E-01 | NS  |
| 64 | M593T164 | 977    | 592.5657 | 164.46 | 1.41E+04 | 1.29E+03 | 4.82E+03 | 4.01E+06 | 8.57E+06 | 7.16E+06 | 4.25E-02 | *   |
| 65 | M378T165 | 362    | 378.3364 | 164.51 | 1.70E+04 | 6.40E+03 | 3.86E+03 | 2.12E+06 | 4.16E+06 | 3.59E+06 | 5.47E-02 | .   |
| 66 | M236T165 | 272    | 236.2371 | 164.83 | 3.31E+04 | 3.91E+04 | 2.50E+04 | 5.17E+06 | 1.16E+07 | 9.66E+06 | 6.51E-05 | *** |

Supplementary Material

|     |          |       |          |        |          |          |          |          |          |          |          |     |
|-----|----------|-------|----------|--------|----------|----------|----------|----------|----------|----------|----------|-----|
| 67  | M254T165 | 42    | 254.2476 | 164.83 | 6.08E+04 | 5.44E+04 | 3.38E+04 | 1.23E+06 | 2.73E+06 | 2.32E+06 | 3.09E-04 | *** |
| 68  | M633T165 | 74    | 632.5775 | 164.90 | 1.71E+04 | 1.16E+04 | 1.53E+05 | 3.54E+06 | 5.27E+06 | 4.58E+06 | 4.53E-02 | *   |
| 69  | M550T165 | 32    | 549.5432 | 165.39 | 5.54E+05 | 6.46E+05 | 1.11E+06 | 1.35E+07 | 3.21E+07 | 2.83E+07 | 7.16E-04 | *** |
| 70  | M531T166 | 4670  | 530.5294 | 165.69 | 0.00E+00 | 1.74E+03 | 0.00E+00 | 1.42E+06 | 3.60E+06 | 3.09E+06 | 3.86E-04 | *** |
| 71  | M549T166 | 1134  | 548.5399 | 165.69 | 6.94E+04 | 5.85E+04 | 3.77E+04 | 3.44E+07 | 8.13E+07 | 7.22E+07 | 4.14E-05 | *** |
| 72  | M551T166 | 16    | 550.5466 | 165.69 | 2.09E+05 | 2.40E+05 | 4.22E+05 | 2.57E+06 | 6.16E+06 | 5.44E+06 | 1.60E-03 | **  |
| 73  | M567T166 | 386   | 566.5502 | 165.80 | 5.65E+03 | 2.13E+03 | 9.88E+03 | 1.27E+06 | 2.93E+06 | 2.61E+06 | 3.26E-04 | *** |
| 74  | M549T171 | 18    | 549.4876 | 171.48 | 6.65E+05 | 7.49E+05 | 1.25E+06 | 1.86E+07 | 1.41E+07 | 1.45E+07 | 1.27E-03 | **  |
| 75  | M550T172 | 15    | 550.4909 | 171.84 | 3.34E+05 | 3.68E+05 | 6.39E+05 | 9.38E+06 | 5.47E+06 | 5.64E+06 | 5.96E-04 | *** |
| 76  | M583T182 | Inf   | 582.5606 | 182.37 | 0.00E+00 | 0.00E+00 | 0.00E+00 | 1.25E+06 | 2.81E+06 | 2.25E+06 | 2.81E-04 | *** |
| 77  | M602T182 | Inf   | 601.5743 | 182.37 | 0.00E+00 | 0.00E+00 | 0.00E+00 | 1.36E+07 | 3.01E+07 | 2.45E+07 | 1.99E-04 | *** |
| 78  | M603T182 | Inf   | 602.5779 | 182.37 | 0.00E+00 | 0.00E+00 | 0.00E+00 | 2.85E+06 | 6.50E+06 | 5.20E+06 | 2.59E-04 | *** |
| 79  | M619T182 | 56    | 618.5815 | 182.37 | 1.73E+04 | 2.95E+04 | 7.95E+04 | 1.43E+06 | 3.13E+06 | 2.55E+06 | 1.16E-02 | *   |
| 80  | M601T183 | 73375 | 600.5710 | 182.52 | 4.65E+02 | 7.35E+02 | 9.43E+02 | 3.18E+07 | 6.95E+07 | 5.60E+07 | 1.73E-04 | *** |
| 81  | M646T183 | 56    | 645.5811 | 182.70 | 2.12E+04 | 2.13E+03 | 9.64E+04 | 1.44E+06 | 2.92E+06 | 2.29E+06 | 1.59E-01 | NS  |
| 82  | M645T183 | Inf   | 644.5777 | 182.80 | 0.00E+00 | 0.00E+00 | 0.00E+00 | 3.18E+06 | 6.18E+06 | 5.31E+06 | 1.72E-04 | *** |
| 83  | M563T192 | 573   | 562.5557 | 191.72 | 5.21E+03 | 4.00E+03 | 4.00E+03 | 1.32E+06 | 3.31E+06 | 2.94E+06 | 3.91E-04 | *** |
| 84  | M659T193 | 326   | 658.5934 | 192.70 | 1.09E+03 | 4.76E+02 | 2.07E+04 | 1.60E+06 | 3.09E+06 | 2.56E+06 | 6.41E-02 | .   |
| 85  | M589T198 | 574   | 588.5712 | 197.64 | 8.65E+03 | 0.00E+00 | 0.00E+00 | 1.17E+06 | 2.09E+06 | 1.70E+06 | 1.43E-04 | *** |
| 86  | M616T202 | 1352  | 615.5901 | 202.01 | 4.19E+03 | 1.15E+03 | 7.37E+02 | 1.72E+06 | 3.60E+06 | 2.89E+06 | 2.21E-04 | *** |
| 87  | M615T202 | 3739  | 614.5866 | 202.19 | 0.00E+00 | 2.86E+03 | 2.10E+03 | 3.96E+06 | 8.09E+06 | 6.50E+06 | 1.84E-04 | *** |
| 88  | M633T202 | 468   | 632.5972 | 202.19 | 2.78E+04 | 1.82E+04 | 1.49E+05 | 1.97E+07 | 3.92E+07 | 3.23E+07 | 1.09E-02 | *   |
| 89  | M634T202 | 27    | 633.6004 | 202.19 | 5.76E+05 | 4.23E+05 | 5.52E+05 | 8.89E+06 | 1.77E+07 | 1.46E+07 | 9.14E-04 | *** |
| 90  | M674T202 | 25    | 673.6124 | 202.44 | 1.05E+05 | 5.68E+04 | 9.05E+04 | 1.53E+06 | 2.57E+06 | 2.09E+06 | 3.96E-04 | *** |
| 91  | M673T202 | 1598  | 672.6090 | 202.50 | 5.78E+02 | 1.23E+03 | 6.63E+03 | 3.42E+06 | 5.53E+06 | 4.53E+06 | 8.34E-05 | *** |
| 92  | M621T223 | 72    | 620.5781 | 223.16 | 5.04E+04 | 2.97E+04 | 1.81E+05 | 4.40E+06 | 7.53E+06 | 6.79E+06 | 1.29E-02 | *   |
| 93  | M236T223 | 81    | 236.2372 | 223.18 | 5.81E+04 | 5.70E+04 | 4.76E+04 | 2.42E+06 | 5.64E+06 | 5.08E+06 | 1.83E-03 | **  |
| 94  | M412T223 | 38    | 412.3784 | 223.18 | 4.50E+04 | 4.34E+04 | 7.29E+04 | 1.22E+06 | 2.56E+06 | 2.32E+06 | 2.76E-04 | *** |
| 95  | M577T223 | 54288 | 576.5713 | 223.18 | 2.59E+03 | 3.58E+03 | 0.00E+00 | 6.09E+07 | 1.42E+08 | 1.32E+08 | 2.15E-04 | *** |
| 96  | M579T223 | 1557  | 578.5779 | 223.18 | 8.17E+03 | 4.01E+03 | 5.96E+03 | 5.15E+06 | 1.20E+07 | 1.11E+07 | 2.86E-04 | *** |
| 97  | M595T223 | 26    | 594.5818 | 223.18 | 7.58E+04 | 2.32E+04 | 4.29E+05 | 2.51E+06 | 5.72E+06 | 5.33E+06 | 4.71E-02 | *   |
| 98  | M559T224 | Inf   | 558.5609 | 223.62 | 0.00E+00 | 0.00E+00 | 0.00E+00 | 2.63E+06 | 5.83E+06 | 5.43E+06 | 2.78E-04 | *** |
| 99  | M578T224 | 1660  | 577.5747 | 223.68 | 4.39E+04 | 3.31E+04 | 7.10E+03 | 2.53E+07 | 5.93E+07 | 5.51E+07 | 8.67E-02 | .   |
| 100 | M603T230 | Inf   | 602.5871 | 230.05 | 0.00E+00 | 0.00E+00 | 0.00E+00 | 5.25E+07 | 1.04E+08 | 8.64E+07 | 1.26E-04 | *** |
| 101 | M585T230 | Inf   | 584.5765 | 230.10 | 0.00E+00 | 0.00E+00 | 0.00E+00 | 2.03E+06 | 4.08E+06 | 3.53E+06 | 2.04E-04 | *** |
| 102 | M605T230 | Inf   | 604.5936 | 230.10 | 0.00E+00 | 0.00E+00 | 0.00E+00 | 5.00E+06 | 1.00E+07 | 8.27E+06 | 1.71E-04 | *** |
| 103 | M621T231 | 47    | 620.5971 | 230.57 | 3.67E+04 | 7.48E+03 | 1.37E+05 | 1.82E+06 | 3.92E+06 | 2.84E+06 | 1.78E-01 | NS  |
| 104 | M604T231 | 9463  | 603.5903 | 230.70 | 6.18E+03 | 5.12E+03 | 0.00E+00 | 2.30E+07 | 4.59E+07 | 3.80E+07 | 1.41E-04 | *** |
| 105 | M646T231 | 30    | 645.5970 | 230.90 | 3.78E+04 | 5.83E+03 | 1.17E+05 | 1.21E+06 | 1.94E+06 | 1.62E+06 | 1.96E-01 | NS  |
| 106 | M647T231 | 228   | 646.5934 | 230.90 | 2.15E+04 | 1.68E+04 | 4.42E+04 | 4.70E+06 | 7.55E+06 | 6.60E+06 | 3.48E-03 | **  |

|     |          |       |          |        |          |          |          |          |          |          |          |     |
|-----|----------|-------|----------|--------|----------|----------|----------|----------|----------|----------|----------|-----|
| 107 | M661T231 | 48    | 660.6092 | 231.03 | 5.87E+04 | 3.78E+04 | 1.18E+05 | 2.99E+06 | 4.12E+06 | 3.25E+06 | 6.27E-03 | **  |
| 108 | M615T238 | 333   | 614.5867 | 238.07 | 4.34E+04 | 8.17E+04 | 0.00E+00 | 4.09E+06 | 1.92E+07 | 1.84E+07 | 1.26E-01 | NS  |
| 109 | M629T248 | 226   | 628.6025 | 247.79 | 4.29E+03 | 1.27E+04 | 1.55E+04 | 1.47E+06 | 3.09E+06 | 2.77E+06 | 7.92E-02 | .   |
| 110 | M597T255 | 1777  | 596.5977 | 255.47 | 5.75E+02 | 0.00E+00 | 3.15E+03 | 1.21E+06 | 2.76E+06 | 2.64E+06 | 3.43E-04 | *** |
| 111 | M631T314 | 132   | 630.6182 | 314.47 | 1.09E+04 | 7.44E+03 | 5.99E+04 | 2.15E+06 | 4.47E+06 | 3.75E+06 | 1.01E-01 | NS  |
| 112 | M949T473 | Inf   | 948.7059 | 472.85 | 0.00E+00 | 0.00E+00 | 0.00E+00 | 1.69E+06 | 3.88E+06 | 4.11E+06 | 3.74E-04 | *** |
| 113 | M359T473 | 105   | 359.2580 | 473.32 | 5.06E+04 | 4.53E+04 | 4.47E+04 | 2.43E+06 | 5.98E+06 | 6.29E+06 | 3.42E-03 | **  |
| 114 | M644T473 | 6105  | 644.4754 | 473.32 | 6.10E+03 | 2.70E+03 | 4.74E+03 | 1.41E+07 | 3.52E+07 | 3.34E+07 | 3.03E-04 | *** |
| 115 | M645T473 | 111   | 645.4759 | 473.32 | 4.22E+04 | 3.52E+04 | 5.26E+04 | 2.49E+06 | 5.95E+06 | 5.99E+06 | 6.47E-04 | *** |
| 116 | M643T474 | 1799  | 643.4721 | 473.78 | 3.84E+04 | 2.42E+04 | 3.92E+04 | 3.09E+07 | 7.98E+07 | 7.24E+07 | 5.22E-05 | *** |
| 117 | M946T474 | Inf   | 945.6964 | 473.78 | 0.00E+00 | 0.00E+00 | 0.00E+00 | 2.92E+07 | 7.49E+07 | 6.95E+07 | 2.89E-04 | *** |
| 118 | M947T474 | Inf   | 946.6995 | 473.78 | 0.00E+00 | 0.00E+00 | 0.00E+00 | 2.00E+07 | 5.16E+07 | 4.75E+07 | 3.03E-04 | *** |
| 119 | M948T474 | 11923 | 947.7031 | 473.78 | 0.00E+00 | 1.48E+03 | 2.01E+03 | 6.99E+06 | 1.80E+07 | 1.67E+07 | 3.45E-04 | *** |
| 120 | M620T519 | 159   | 620.4748 | 519.47 | 1.85E+04 | 2.17E+04 | 1.87E+04 | 1.00E+06 | 4.05E+06 | 4.32E+06 | 5.49E-03 | **  |
| 121 | M619T520 | 75    | 619.4715 | 519.94 | 1.19E+05 | 9.66E+04 | 1.16E+05 | 4.46E+06 | 1.01E+07 | 1.03E+07 | 2.45E-03 | **  |
| 122 | M923T520 | Inf   | 922.6989 | 519.94 | 0.00E+00 | 0.00E+00 | 0.00E+00 | 3.61E+06 | 8.36E+06 | 8.43E+06 | 3.24E-04 | *** |
| 123 | M922T520 | Inf   | 921.6957 | 519.95 | 0.00E+00 | 0.00E+00 | 0.00E+00 | 2.92E+06 | 1.24E+07 | 1.29E+07 | 9.51E-04 | *** |

**Supplementary Table S2:** List of the *Plasmopara*-specific ions identified by non-targeted metabolomics, which have been characterized in this work. Ions are numbered according to their retention time and are organized as derivatives of EPA, AA and ceramides, indicated in green, blue and red, respectively. Major compounds are indicated in bold. Identifications confirmed by the corresponding standards are marked by a grey background. Putative identifications are indicated with italics. For all ions, the identifier, the *m/z*, retention time (RT) and fold change between sporangia and leaf extracts are indicated.

| Ion n°     | Identifier      | Fold       | <i>m/z</i>       | RT (s)         | Ion formula                                       | (Putative) identification                        |
|------------|-----------------|------------|------------------|----------------|---------------------------------------------------|--------------------------------------------------|
| <b>10</b>  | <b>M303T44</b>  | <b>347</b> | <b>303,2316</b>  | <b>43,87</b>   | <b>C<sub>20</sub>H<sub>30</sub>O<sub>2</sub></b>  | <b>eicosapentaenoic acid (EPA)</b>               |
| <b>11</b>  | M304T44         | 436        | 304,2350         | 43,87          |                                                   | isotope of M303T44                               |
| <b>5</b>   | <b>M377T39</b>  | <b>220</b> | <b>377,2683</b>  | <b>38,81</b>   | <b>C<sub>23</sub>H<sub>37</sub>O<sub>4</sub></b>  | <b>eicosapentaenoyl-glycerol (EPG)</b>           |
| <b>6</b>   | M378T39         | 86         | 378,2717         | 38,81          |                                                   | isotope of M377T39                               |
| <b>4</b>   | M359T39         | 53         | 359,2577         | 38,81          | C <sub>23</sub> H <sub>35</sub> O <sub>3</sub>    | fragment EPG [M-H <sub>2</sub> O+H] <sup>+</sup> |
| <b>16</b>  | <b>M661T85</b>  | <b>38</b>  | <b>661,4825</b>  | <b>84,66</b>   |                                                   | <b>dieicosapentaenoyl-glycerol (DEPG)</b>        |
| <b>18</b>  | M662T92         | 42         | 662,4856         | 91,67          |                                                   | isotope of M661T85                               |
| <b>117</b> | <b>M946T474</b> | <b>Inf</b> | <b>945,6964</b>  | <b>473,78</b>  | <b>C<sub>63</sub>H<sub>93</sub>O<sub>6</sub></b>  | <b>trieicosapentaenoyl-glycerol (TEPG)</b>       |
| <b>118</b> | M947T474        | Inf        | 946,6995         | 473,78         |                                                   | isotope of M946T474                              |
| <b>119</b> | M948T474        | 11923      | 947,7031         | 473,78         |                                                   | isotope of M946T474                              |
| <b>112</b> | M949T473        | Inf        | 948,7059         | 472,85         |                                                   | isotope of M946T474                              |
| <b>113</b> | M359T473        | 105        | 359,2580         | 473,32         | C <sub>23</sub> H <sub>35</sub> O <sub>3</sub>    | fragment EPG                                     |
| <b>116</b> | M643T474        | 1799       | 643,4721         | 473,78         | C <sub>46</sub> H <sub>59</sub> O <sub>2</sub>    | fragment EPA-diglycerol                          |
| <b>114</b> | M644T473        | 6105       | 644,4754         | 473,32         |                                                   | isotope of M643T473                              |
| <b>115</b> | M645T473        | 111        | 645,4759         | 473,32         |                                                   | isotope of M643T473                              |
| <b>12</b>  | <b>M305T48</b>  | <b>68</b>  | <b>305,2474</b>  | <b>47,97</b>   | <b>C<sub>20</sub>H<sub>32</sub>O<sub>2</sub></b>  | <b>arachidonic acid (AA)</b>                     |
| <b>8</b>   | <b>M379T42</b>  | <b>29</b>  | <b>379,2839</b>  | <b>41,59</b>   | <b>C<sub>23</sub>H<sub>39</sub>O<sub>4</sub></b>  | <b>arachidonoyl-glycerol (AG)</b>                |
| <b>7</b>   | M380T41         | 29         | 380,2873         | 41,13          |                                                   | isotope of M379T42                               |
| <b>30</b>  | <b>M666T124</b> | <b>48</b>  | <b>665,5134</b>  | <b>123,80</b>  | <b>C<sub>43</sub>H<sub>69</sub>O<sub>5</sub></b>  | <b>diarachidonoyl-glycerol (DAG)</b>             |
| <b>31</b>  | M667T124        | 245        | 666,5168         | 123,80         |                                                   | isotope of M666T124                              |
| <b>19</b>  | <b>M492T96</b>  | <b>Inf</b> | <b>492,4773</b>  | <b>96,14</b>   | <b>C<sub>32</sub>H<sub>64</sub>NO<sub>3</sub></b> | <b>Cer(d16:1/16:0)</b>                           |
| <b>20</b>  | M493T96         | 380        | 493,4807         | 96,14          |                                                   | isotope of M492T96                               |
| <b>40</b>  | <b>M539T125</b> | <b>16</b>  | <b>538,5189</b>  | <b>125,15</b>  | <b>C<sub>34</sub>H<sub>68</sub>NO<sub>3</sub></b> | <b>Cer(d16:1/18:0)</b>                           |
| <b>41</b>  | M540T125        | 35         | 539,5223         | 125,15         |                                                   | isotope of M539T125                              |
| <b>37</b>  | M521T125        | 14665      | 520,5084         | 125,15         | C <sub>34</sub> H <sub>66</sub> NO <sub>2</sub>   | fragment [M-H <sub>2</sub> O+H] <sup>+</sup>     |
| <b>38</b>  | M522T125        | 200        | 521,5117         | 125,15         |                                                   | isotope of M521T125                              |
| <b>39</b>  | M523T125        | 109        | 522,5150         | 125,15         |                                                   | isotope of M521T125                              |
| <b>35</b>  | M502T125        | Inf        | 502,4980         | 125,15         | C <sub>34</sub> H <sub>64</sub> NO                | fragment [M-2H <sub>2</sub> O+H] <sup>+</sup>    |
| <b>36</b>  | M504T125        | 141        | 503,5013         | 125,15         |                                                   | isotope of M502T125                              |
| <b>33</b>  | M236T125        | 173        | 236,2371         | 125,15         | C <sub>16</sub> H <sub>30</sub> N                 | fragment N from Cer(d16:1/18:0)                  |
| <b>34</b>  | M254T125        | 29         | 254,2477         | 125,15         | C <sub>16</sub> H <sub>32</sub> NO                | fragment N' from Cer(d16:1/18:0)                 |
| <b>42</b>  | M356T126        | 128        | 356,3156         | 125,61         | C <sub>21</sub> H <sub>42</sub> NO <sub>3</sub>   | fragment C from Cer(d16:1/18:0)                  |
| <b>43</b>  | M284T126        | 22         | 284,2945         | 126,06         | C <sub>18</sub> H <sub>38</sub> NO                | fragment A from Cer(d16:1/18:0)                  |
| <b>73</b>  | <b>M567T166</b> | <b>386</b> | <b>566,5502</b>  | <b>165,80</b>  | <b>C<sub>36</sub>H<sub>72</sub>NO<sub>3</sub></b> | <b>Cer(d16:1/20:0)</b>                           |
| <b>71</b>  | M549T166        | 1134       | 548,5399         | 165,69         | C <sub>36</sub> H <sub>70</sub> NO <sub>2</sub>   | fragment [M-H <sub>2</sub> O+H] <sup>+</sup>     |
| <b>69</b>  | M550T165        | 32         | 549,5432         | 165,39         |                                                   | isotope of M549T166                              |
| <b>72</b>  | M551T166        | 16         | 550,5466         | 165,69         |                                                   | isotope of M549T166                              |
| <b>70</b>  | M531T166        | 4670       | 530,5294         | 165,69         | C <sub>36</sub> H <sub>68</sub> NO                | fragment [M-2H <sub>2</sub> O+H] <sup>+</sup>    |
| <b>66</b>  | M236T165        | 272        | 236,2371         | 164,83         | C <sub>16</sub> H <sub>30</sub> N                 | fragment N from Cer(d16:1/20:0)                  |
| <b>67</b>  | M254T165        | 42         | 254,2476         | 164,83         | C <sub>16</sub> H <sub>32</sub> NO                | fragment N' from Cer(d16:1/20:0)                 |
| <b>97</b>  | M595T223        | 26         | 594,5818         | 223,18         | <b>C<sub>38</sub>H<sub>76</sub>NO<sub>3</sub></b> | <b>Cer(d16:1/22:0)</b>                           |
| <b>95</b>  | M577T223        | 54288      | 576,5713         | 223,18         | C <sub>38</sub> H <sub>72</sub> NO <sub>2</sub>   | fragment [M-H <sub>2</sub> O+H] <sup>+</sup>     |
| <b>99</b>  | M578T224        | 1660       | 577,5747         | 223,68         |                                                   | isotope of M577T223                              |
| <b>96</b>  | M579T223        | 1557       | 578,5779         | 223,18         |                                                   | isotope of M577T223                              |
| <b>98</b>  | M559T224        | Inf        | 558,5609         | 223,62         | C <sub>38</sub> H <sub>70</sub> NO                | fragment [M-2H <sub>2</sub> O+H] <sup>+</sup>    |
| <b>93</b>  | M236T223        | 81         | 236,2372         | 223,18         | C <sub>16</sub> H <sub>30</sub> N                 | fragment N from Cer(d16:1/22:0)                  |
| <b>94</b>  | M412T223        | 38         | 412,3784         | 223,18         | C <sub>25</sub> H <sub>50</sub> NO <sub>3</sub>   | fragment C from Cer(d16:1/22:0)                  |
| <b>13</b>  | M281T50         | 16         | 281,2473         | 50,26          | <b>C<sub>18</sub>H<sub>32</sub>O<sub>2</sub></b>  | <i>C<sub>18:2</sub> acid</i>                     |
| <b>46</b>  | <b>M642T142</b> | <b>144</b> | <b>641,51342</b> | <b>141,805</b> | <b>C<sub>41</sub>H<sub>69</sub>O<sub>5</sub></b>  | <b>diglyceride 20:5/18:1</b>                     |
| <b>47</b>  | M643T142        | 153        | 642,51677        | 141,805        |                                                   | isotope of M642T142                              |
| <b>48</b>  | M359T142        | 91         | 359,2577         | 142,260        | C <sub>23</sub> H <sub>35</sub> O <sub>3</sub>    | fragment EPG                                     |

**Supplementary Table S3:** APCI(+)-MS data for ceramides from *P. viticola* (n° **19**, **40**, **73**, **97**) and for the commercial ceramide standards Cer(d16:1/16:0) and Cer(d18:1/20:0). For fragments nomenclature, see Figure S1. The most abundant fragments in each spectrum is indicated in bold. Fragments listed in XCMS table are in italics. For all ions, error in mass accuracy is under 1 ppm.

| <b>compound</b>                                       | <b>19</b>                                        | <b>40</b>                                        | <b>73</b>                                        | <b>97</b>                                         | <i>Cer(d16:1/16:0)</i>                           | <i>Cer(d18:1/20:0)</i>                            |
|-------------------------------------------------------|--------------------------------------------------|--------------------------------------------------|--------------------------------------------------|---------------------------------------------------|--------------------------------------------------|---------------------------------------------------|
| <b>structure</b>                                      | <i>Cer(d16:1/16:0)</i>                           | <i>Cer(d16:1/18:0)</i>                           | <i>Cer(d16:1/20:0)</i>                           | <i>Cer(d16:1/22:0)</i>                            |                                                  |                                                   |
| <b>RT (min)</b>                                       | 1.6                                              | 2.08                                             | 2.74                                             | 3.72                                              | 1.6                                              | 4.20                                              |
| <b>Chemical formula</b>                               | C <sub>32</sub> H <sub>63</sub> O <sub>3</sub> N | C <sub>34</sub> H <sub>67</sub> O <sub>3</sub> N | C <sub>36</sub> H <sub>71</sub> O <sub>3</sub> N | <i>C<sub>38</sub>H<sub>75</sub>O<sub>3</sub>N</i> | C <sub>32</sub> H <sub>63</sub> O <sub>3</sub> N | <i>C<sub>38</sub>H<sub>75</sub>O<sub>3</sub>N</i> |
| <b>fragments</b>                                      |                                                  |                                                  |                                                  |                                                   |                                                  |                                                   |
| [M + H] <sup>+</sup>                                  | 510.4877                                         | <i>538.5189</i>                                  | <i>566.5502</i>                                  | <i>594.5818</i>                                   | 510.4877                                         | 594.5819                                          |
| [M-H <sub>2</sub> O+H] <sup>+</sup>                   | <b>492.4773</b>                                  | <b>520.5084</b>                                  | <b>548.5399</b>                                  | <b>576.5713</b>                                   | <b>492.4772</b>                                  | <b>576.5714</b>                                   |
| [M-2H <sub>2</sub> O+H] <sup>+</sup>                  | 474.4667                                         | <i>502.4979</i>                                  | <i>530.5294</i>                                  | <i>558.5609</i>                                   | 474.4667                                         | 558.561                                           |
| [M-H <sub>2</sub> O-CH <sub>2</sub> O+H] <sup>+</sup> | 462.4665                                         | 490.4981                                         | 518.5301                                         | 546.5604                                          | 462.4665                                         | 546.5615                                          |
| Sphingosine                                           |                                                  |                                                  |                                                  |                                                   |                                                  |                                                   |
| fragment N                                            | 236.2371                                         | <i>236.2371</i>                                  | <i>236.2371</i>                                  | <i>236.2372</i>                                   | 236.2372                                         | 264.2683                                          |
| fragment N'                                           | 254.2476                                         | <i>254.2476</i>                                  | <i>254.2476</i>                                  | 254.2476                                          | 254.2476                                         | 282.2791                                          |
| Fatty acid                                            |                                                  |                                                  |                                                  |                                                   |                                                  |                                                   |
| fragment A                                            | 256.2635                                         | <i>284.2945</i>                                  | <i>312.3257</i>                                  | <i>340.3574</i>                                   | 256.2631                                         | 312.326                                           |
| fragment B                                            | 298.2754                                         | 326.3051                                         | <i>354.3357</i>                                  | <i>382.3681</i>                                   | 298.2751                                         | 354.3366                                          |
| fragment C                                            | 328.2844                                         | <i>356.3156</i>                                  | <i>384.3467</i>                                  | <i>412.3784</i>                                   | 328.2846                                         | 384.3474                                          |

**Supplementary Table S4:** P-values and significances of Welch's *t*-test comparing inoculated and non-inoculated samples for each variety and for each compound, at each time point. Genotypes with different susceptibility to downy mildew were used: Syrah (fully susceptible), Bianca (partially resistant) and *V. riparia* (resistant). For each variety, inoculated (I) and non-inoculated (NI) leaf discs were analyzed for *Plasmopara*-specific lipids 0h, 24h, 48h, 72h and 144h post treatment. Three biological replicates were analyzed for each of these 30 conditions, representing a total of 90 analyzes. For p-value calculation, background intensity level was set to 10000 and subtracted to every integrated value. Integrated values under the background intensity were set at 1. These corrected integrated values were log10-transformed before performing Welch's two-sample *t*-tests. TPI = Time Post-Inoculation. NA refers to inapplicable statistical tests, for which the compounds could not be detected above the background level. NS = Not significant = p-value > 0.05 ; \* = 0.01 < p-value ≤ 0.05 ; \*\* = 0.001 < p-value ≤ 0.01 ; \*\*\* = 0.001 ≤ p-value.

| Variety           | TPI  | AA       |       | AG       |       | DAG      |       | EPA      |       | EPG      |       | DEPG     |       | TEPG     |       | Cer(d16:1/16:0) |       | Cer(d16:1/18:0) |       | Cer(d16:1/20:0) |       | Cer(d16:1/22:0) |       |
|-------------------|------|----------|-------|----------|-------|----------|-------|----------|-------|----------|-------|----------|-------|----------|-------|-----------------|-------|-----------------|-------|-----------------|-------|-----------------|-------|
|                   |      | Pvalue   | Signi | Pvalue   | Signi | Pvalue   | Signi | Pvalue   | Signi | Pvalue   | Signi | Pvalue   | Signi | Pvalue   | Signi | Pvalue          | Signi | Pvalue          | Signi | Pvalue          | Signi | Pvalue          | Signi |
| Syrah             | 0h   | NA       | NS    | NA       | NS    | NA       | NS    | NA       | NS    | NA       | NS    | NA       | NS    | NA       | NS    | NA              | NS    | NA              | NS    | NA              | NS    | NA              | NS    |
| Syrah             | 24h  | NA       | NS    | NA       | NS    | NA       | NS    | 7,09E-04 | ***   | NA       | NS    | 5,46E-04 | ***   | 4,23E-01 | NS    | 5,96E-04        | ***   | 5,17E-04        | ***   | 3,69E-04        | ***   | 2,50E-04        | ***   |
| Syrah             | 48h  | NA       | NS    | NA       | NS    | 4,23E-01 | NS    | 2,76E-04 | ***   | NA       | NS    | 3,51E-04 | ***   | 1,84E-01 | NS    | 1,59E-03        | **    | 8,62E-04        | ***   | 4,28E-04        | ***   | 2,77E-04        | ***   |
| Syrah             | 72h  | 2,21E-03 | **    | NA       | NS    | 4,23E-01 | NS    | 1,09E-03 | **    | NA       | NS    | 5,25E-04 | ***   | 9,77E-04 | ***   | 2,72E-03        | **    | 5,43E-04        | ***   | 3,35E-04        | ***   | 3,23E-04        | ***   |
| Syrah             | 6dpi | 5,18E-04 | ***   | 2,88E-04 | ***   | 3,39E-04 | ***   | 4,05E-04 | ***   | 1,25E-04 | ***   | 2,56E-04 | ***   | 1,68E-05 | ***   | 1,48E-04        | ***   | 7,09E-05        | ***   | 2,16E-04        | ***   | 1,02E-04        | ***   |
| Bianca            | 0h   | NA       | NS    | NA       | NS    | NA       | NS    | NA       | NS    | NA       | NS    | NA       | NS    | NA       | NS    | NA              | NS    | NA              | NS    | NA              | NS    | NA              | NS    |
| Bianca            | 24h  | NA       | NS    | NA       | NS    | NA       | NS    | 1,94E-02 | *     | NA       | NS    | 1,84E-01 | NS    | NA       | NS    | 1,98E-01        | NS    | 4,23E-01        | NS    | 1,05E-02        | *     | 1,67E-03        | **    |
| Bianca            | 48h  | NA       | NS    | NA       | NS    | NA       | NS    | 2,92E-04 | ***   | NA       | NS    | 2,24E-03 | **    | 1,86E-01 | NS    | 4,23E-01        | NS    | 1,84E-01        | NS    | 8,05E-04        | ***   | 7,36E-04        | ***   |
| Bianca            | 72h  | NA       | NS    | NA       | NS    | NA       | NS    | 1,95E-03 | **    | NA       | NS    | 1,98E-03 | **    | 9,41E-04 | ***   | NA              | NS    | 1,42E-02        | *     | 7,78E-04        | ***   | 7,14E-04        | ***   |
| Bianca            | 6dpi | 1,01E-04 | ***   | NA       | NS    | 1,84E-01 | NS    | 1,86E-05 | ***   | 3,35E-04 | ***   | 2,28E-04 | ***   | 1,67E-04 | ***   | 1,56E-03        | **    | 2,58E-04        | ***   | 2,01E-04        | ***   | 1,89E-04        | ***   |
| <i>V. riparia</i> | 0h   | NA       | NS    | NA       | NS    | NA       | NS    | NA       | NS    | NA       | NS    | NA       | NS    | NA       | NS    | NA              | NS    | NA              | NS    | NA              | NS    | NA              | NS    |
| <i>V. riparia</i> | 24h  | 4,62E-04 | ***   | NA       | NS    | NA       | NS    | 9,62E-05 | ***   | NA       | NS    | 4,38E-04 | ***   | 4,23E-01 | NS    | 4,77E-04        | ***   | 5,60E-04        | ***   | 3,65E-04        | ***   | 1,66E-04        | ***   |
| <i>V. riparia</i> | 48h  | NA       | NS    | NA       | NS    | NA       | NS    | 1,16E-03 | **    | NA       | NS    | 1,21E-04 | ***   | 8,76E-03 | **    | 3,38E-04        | ***   | 8,66E-05        | ***   | 4,69E-04        | ***   | 8,23E-05        | ***   |
| <i>V. riparia</i> | 72h  | NA       | NS    | NA       | NS    | NA       | NS    | 9,54E-04 | ***   | NA       | NS    | 1,20E-04 | ***   | 2,47E-03 | **    | 1,47E-03        | **    | 2,97E-03        | **    | 6,59E-04        | ***   | 5,06E-04        | ***   |
| <i>V. riparia</i> | 6dpi | NA       | NS    | NA       | NS    | NA       | NS    | 4,23E-01 | NS    | NA       | NS    | 7,44E-04 | ***   | 1,84E-01 | NS    | 1,84E-01        | NS    | 8,13E-05        | ***   | 4,82E-04        | ***   | 3,57E-05        | ***   |



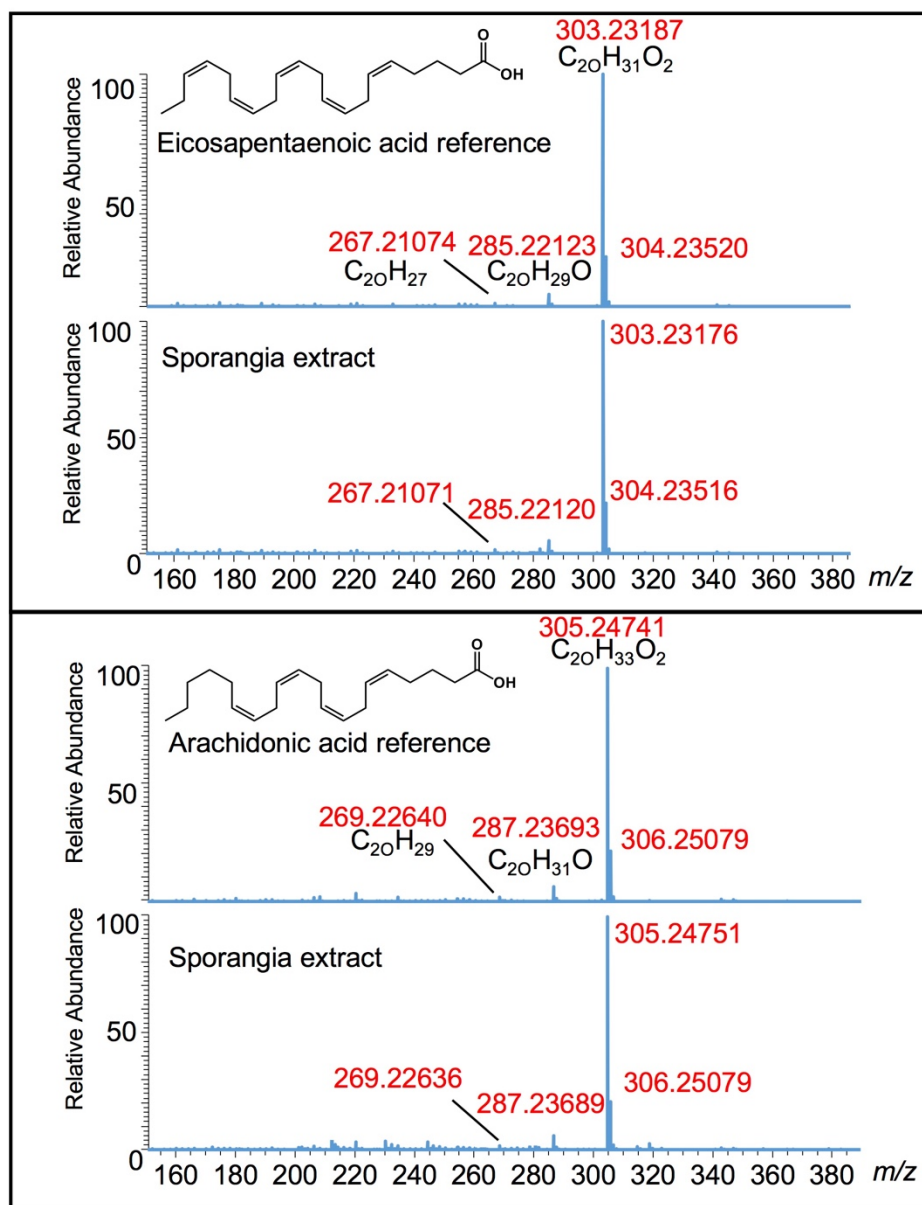

**Supplementary Figure S1:** Identification of EPA and AA in *P. viticola* sporangia extract by comparison of their mass spectrum to that of the corresponding commercial reference. Spectra were obtained with an APCI source operating in positive mode.

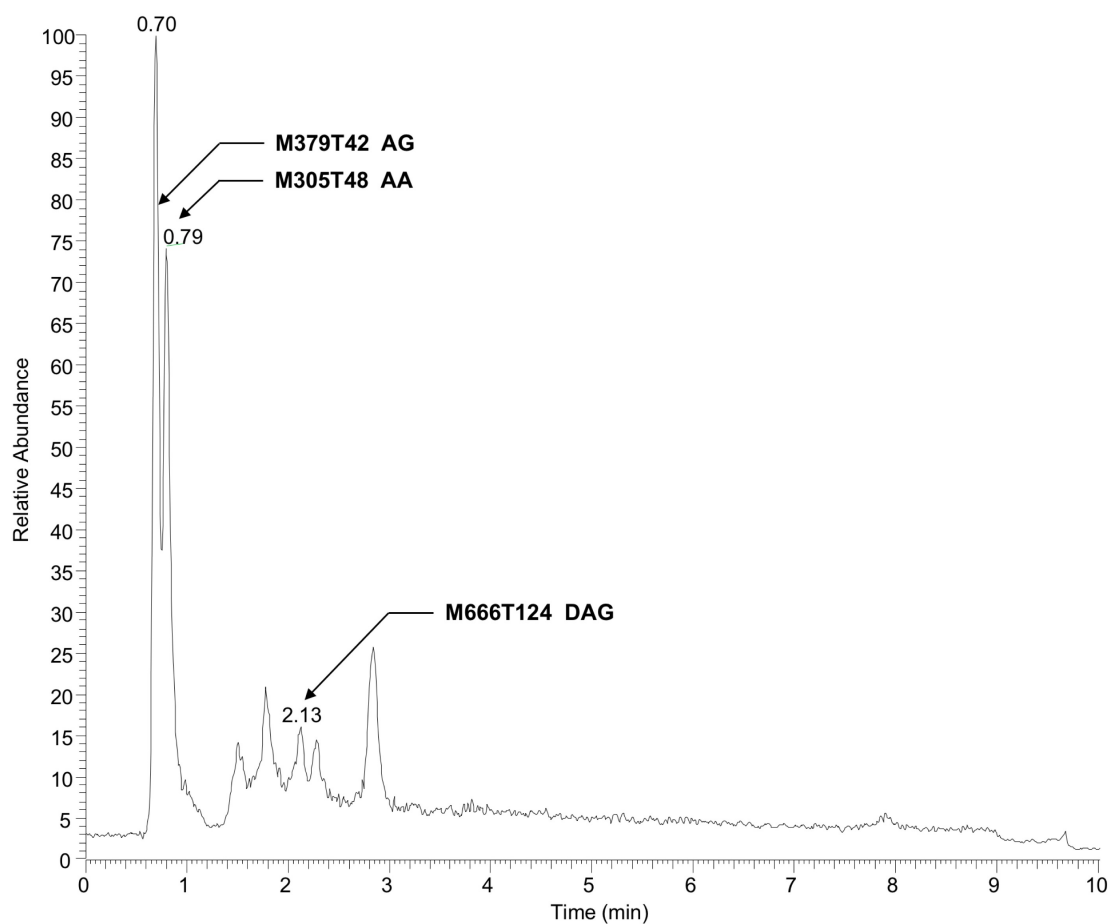

**Supplementary Figure S2:** EIC of sporangia extracts for  $m/z$  287.2369 ( $\pm 2$  ppm), a characteristic ion of AA. Peaks corresponding to *Plasmopara*-specific ions identified by the non-targeted metabolomic approach (Table 1) are indicated. Compounds whose identity has been confirmed by using the corresponding standards are indicated in bold.

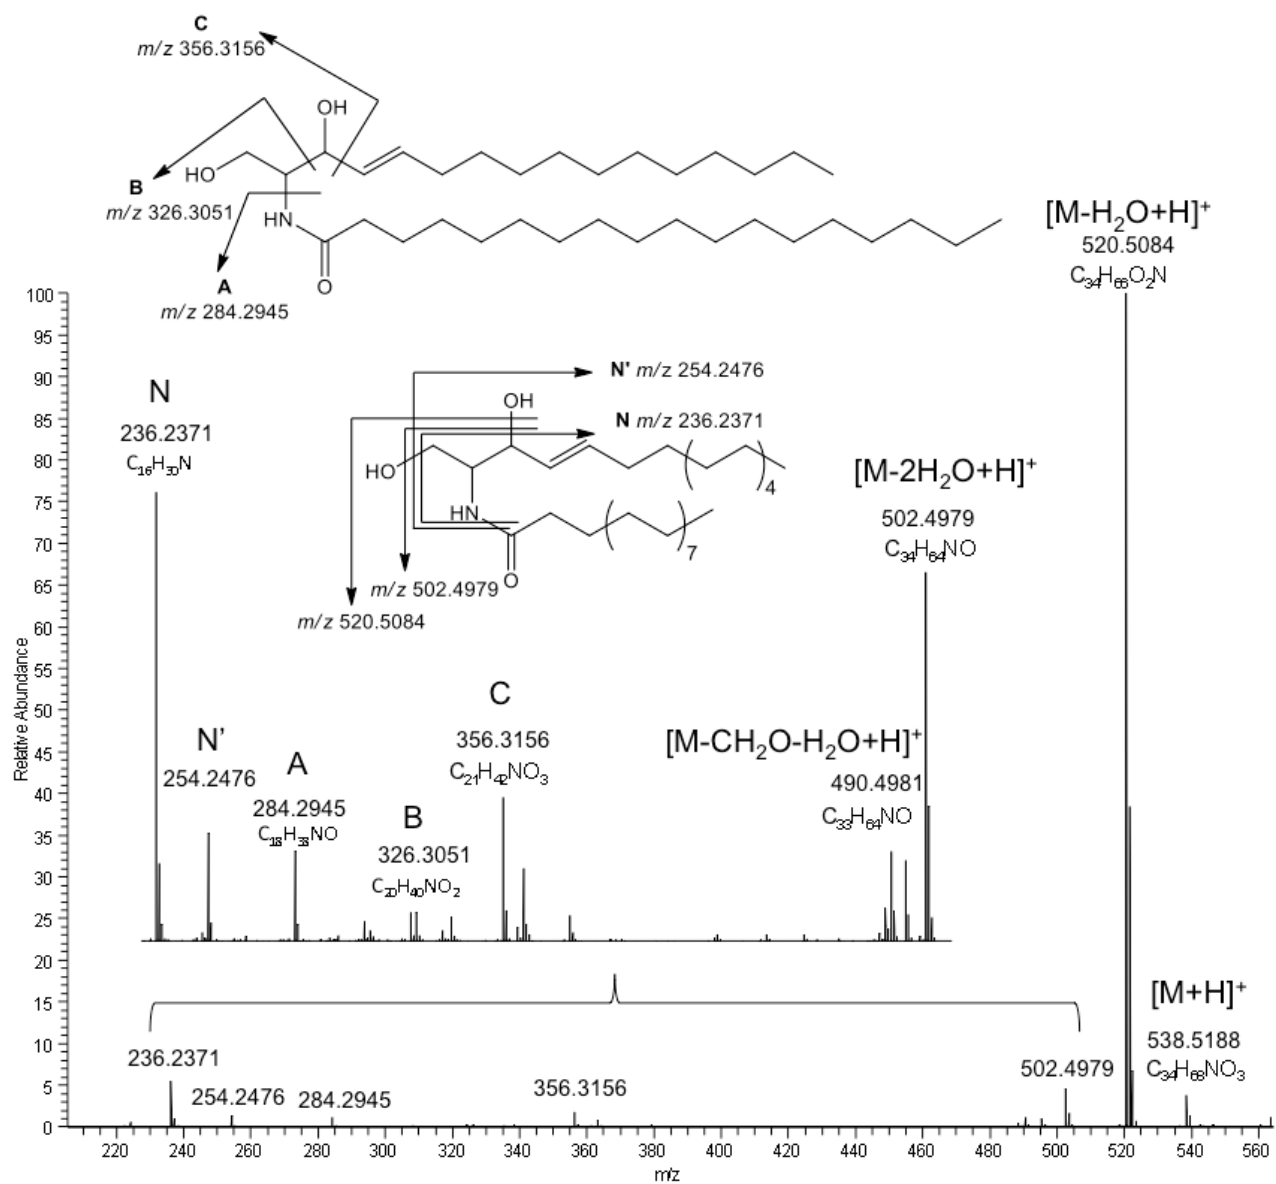

**Supplementary Figure S3:** Mass spectrum of putative Cer(d16:1/18:0) (M521T125, n°37) from *P. viticola*. The fragmentation giving rise to the main fragments is indicated.

**Supplementary Figure S4:** Kinetic analysis of *Plasmopara*-specific lipids accumulation following downy mildew infection in different grapevine cultivars. Grapevine cultivars with different susceptibility to downy mildew were used: Syrah (fully susceptible), Bianca (partially resistant) and *V. riparia* (resistant). For each variety, inoculated (I) and non-inoculated (NI) leaf discs were analyzed for *Plasmopara*-specific lipids 0h, 24h, 48h, 72h and 144h post treatment. Three biological replicates were analyzed for each of these 30 conditions, representing a total of 90 analyses. Means are presented, with bars indicating standard deviation.

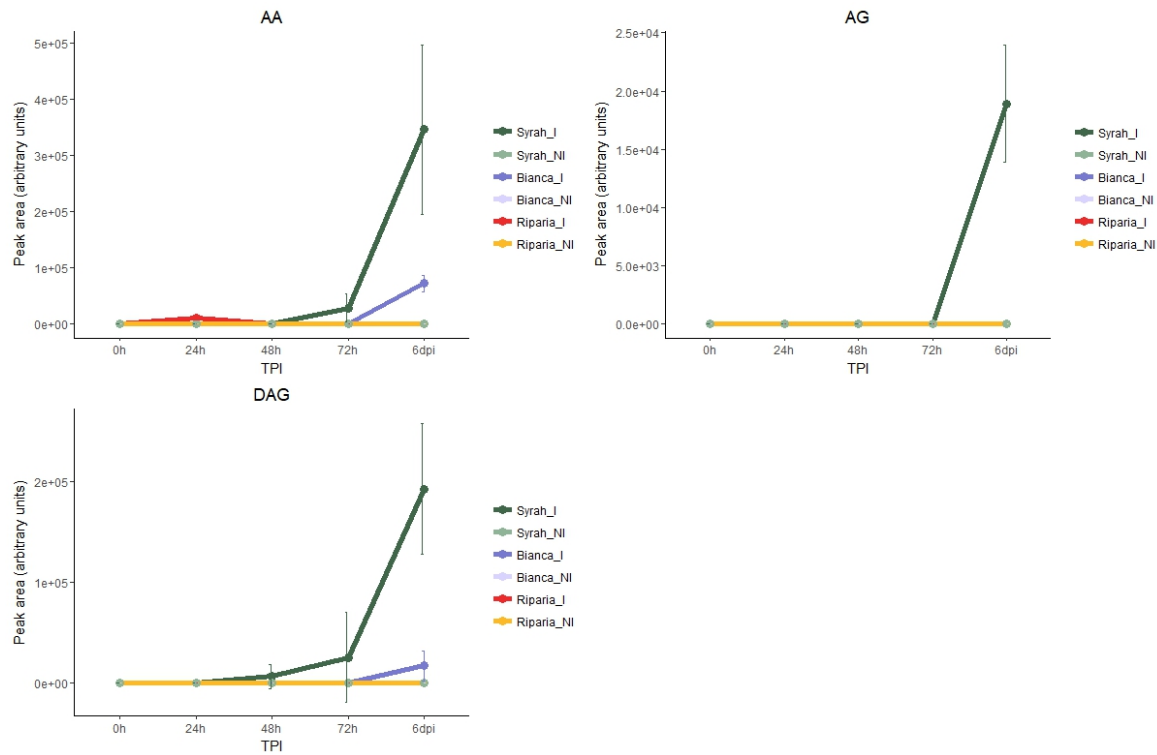

Supplement: Presentation1.pdf [file Presentation1.pdf]
